# Supplementary material for: Synthesis of precursors and macrocycle analogs of aerucyclamides as anti-trypanosomal agents
Source: Royal Society of Chemistry journal article supplement (doi:10.1039/c2md20218b), 2012-01-01

Bis-azole 12a

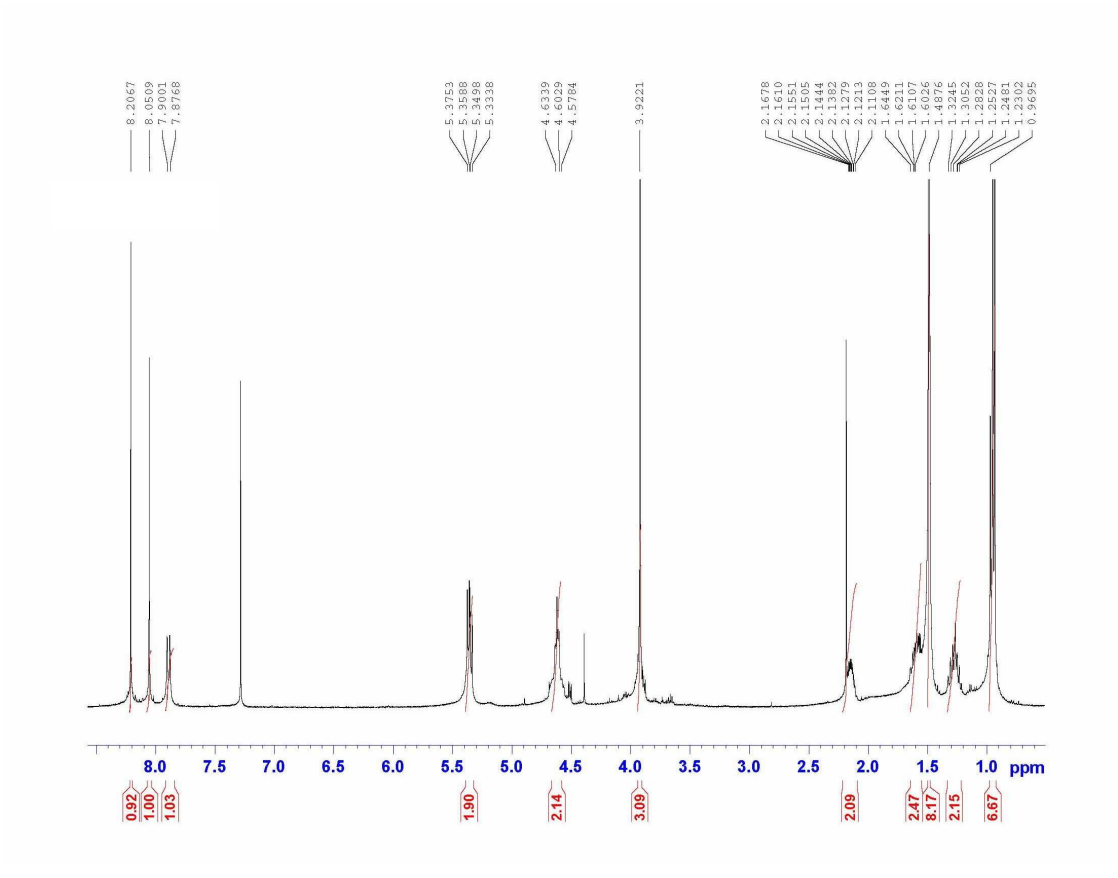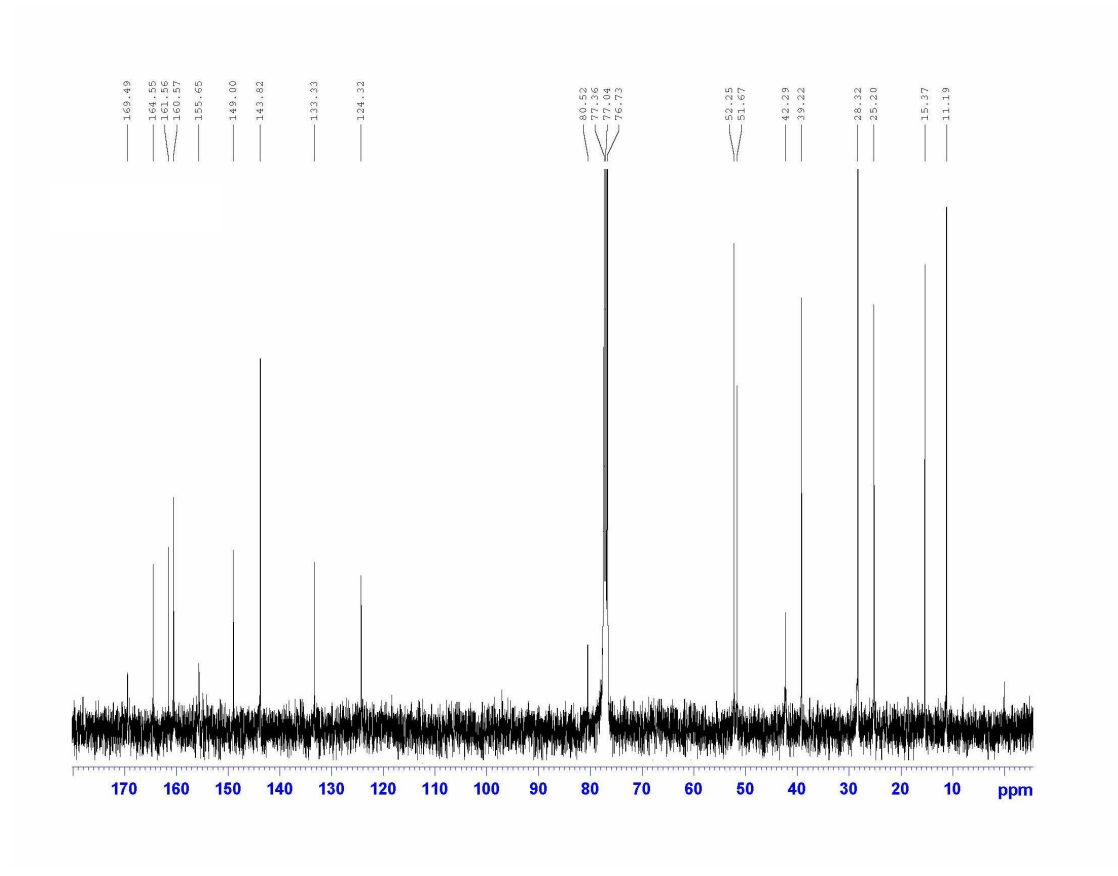

SHIMADZU

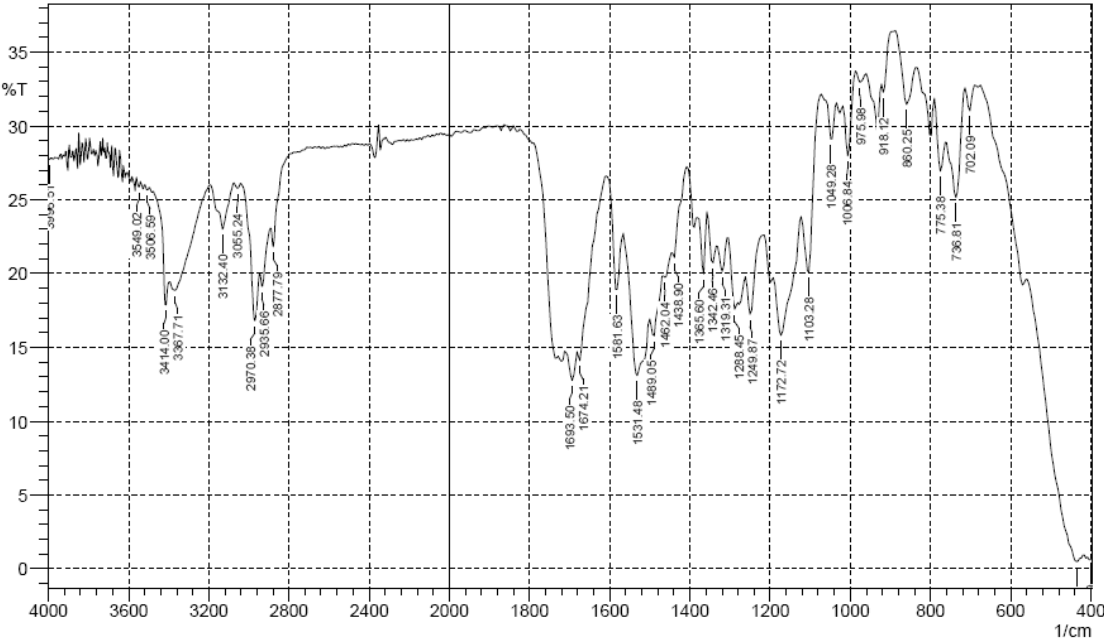

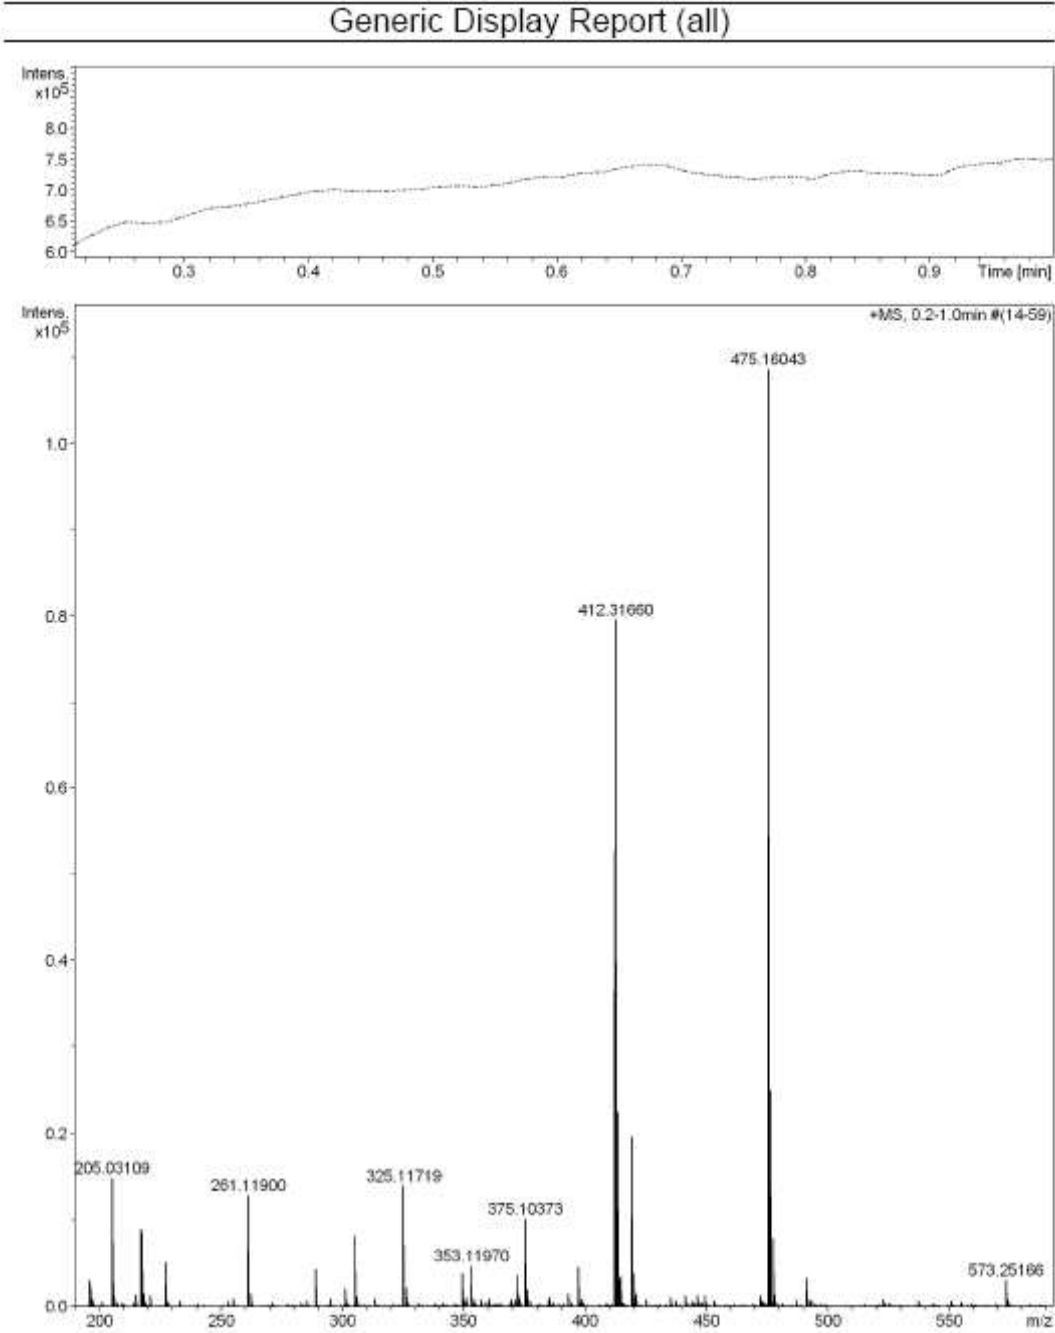

Bis-oxazole 12b

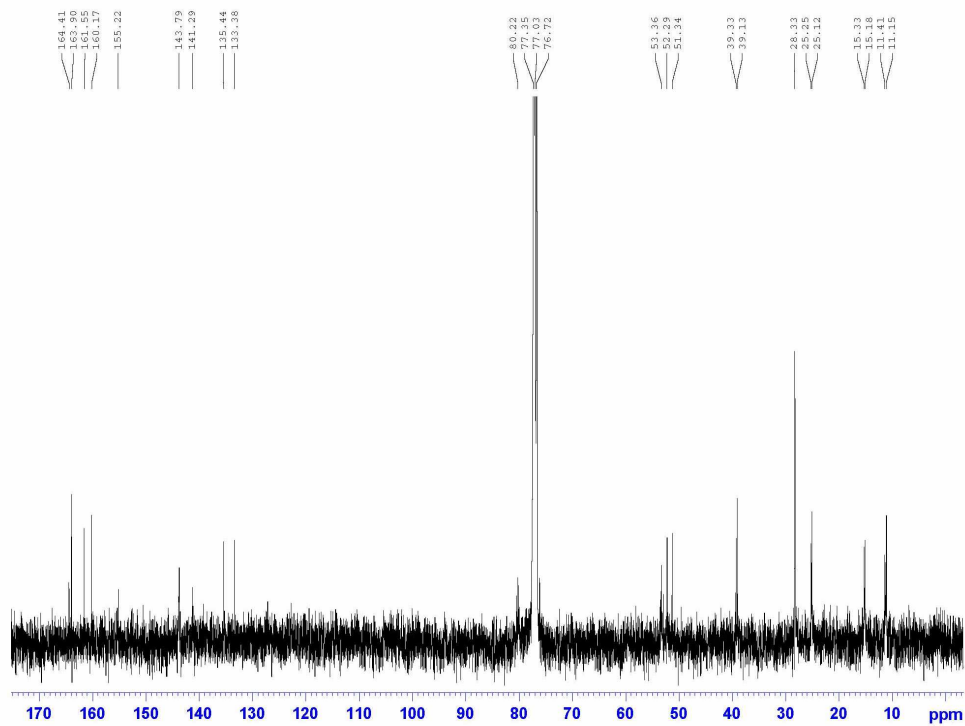

SHIMADZU

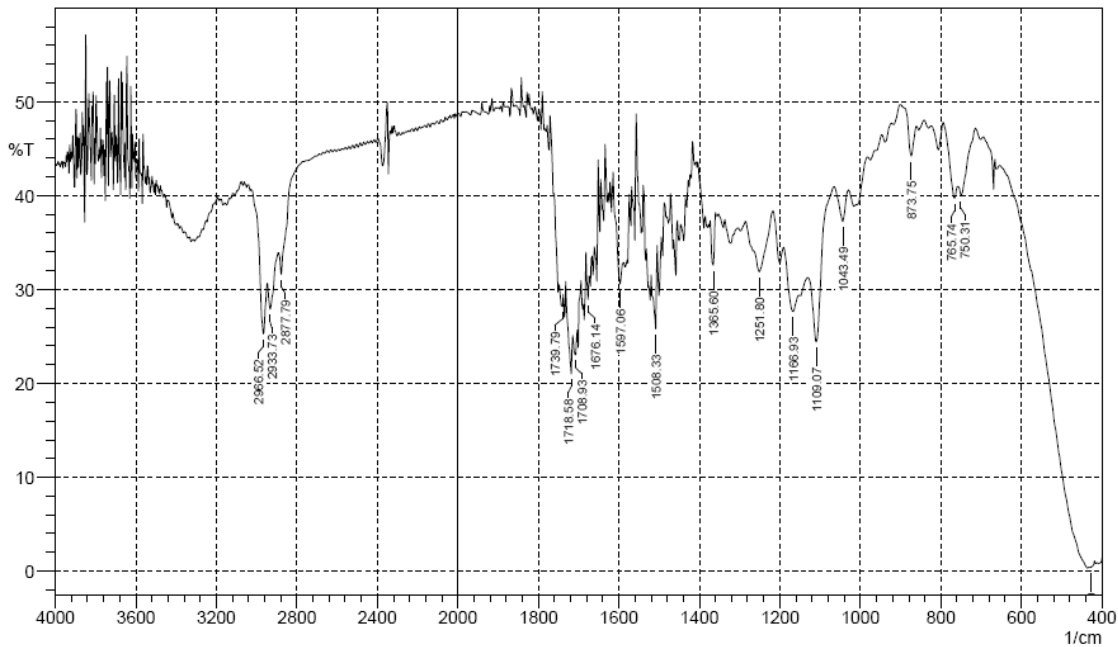

Generic Display Report (all)

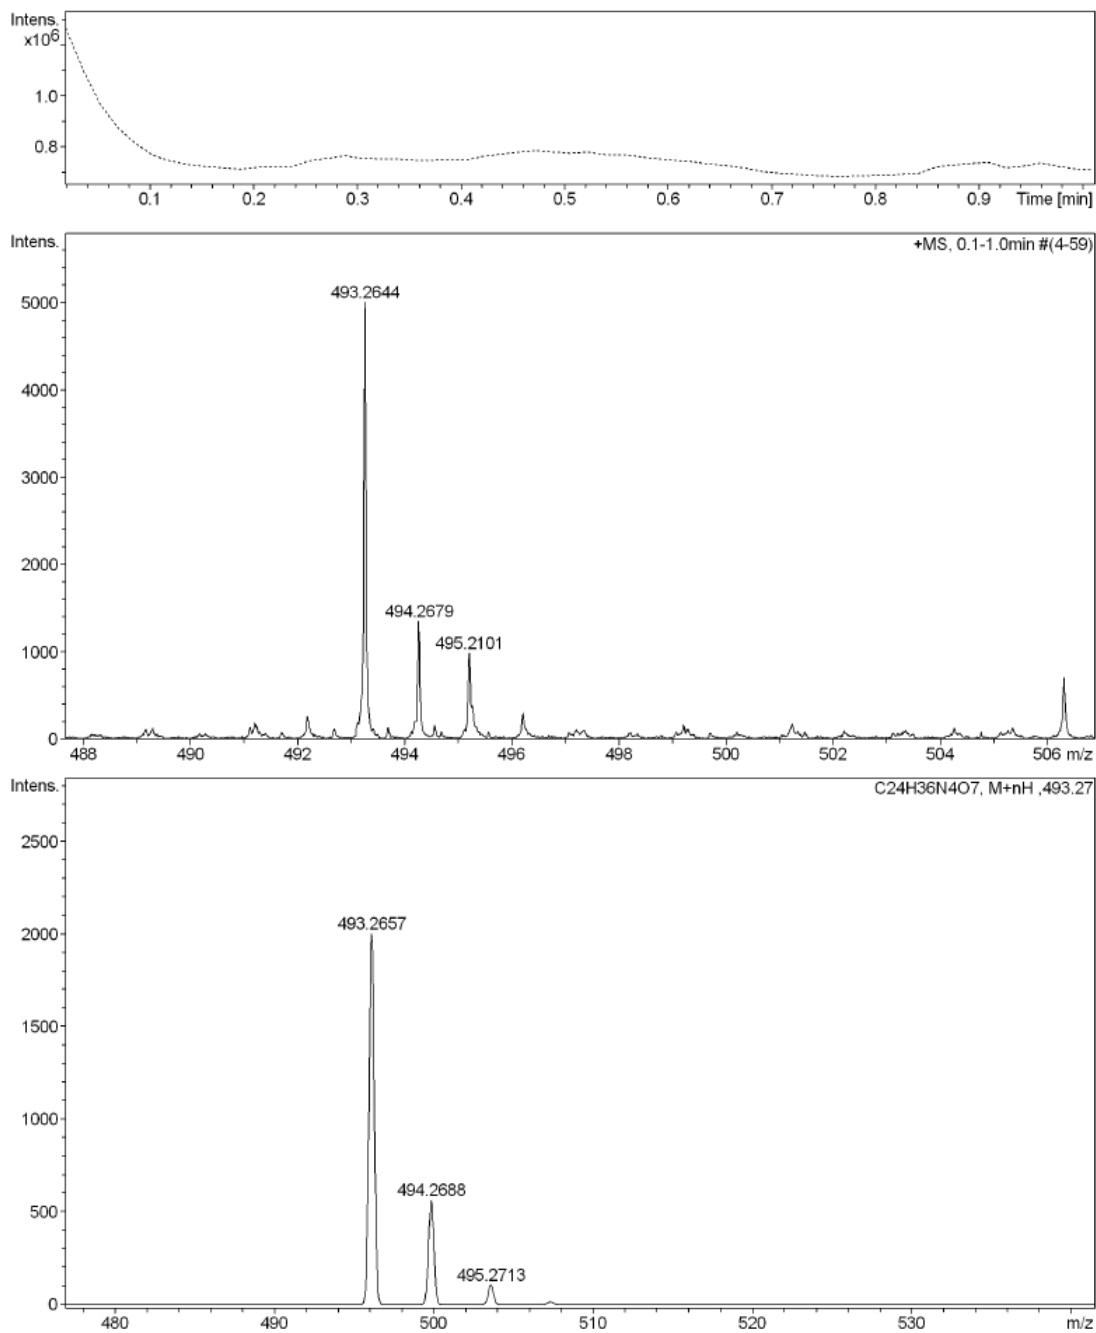

Tris-azole 13a

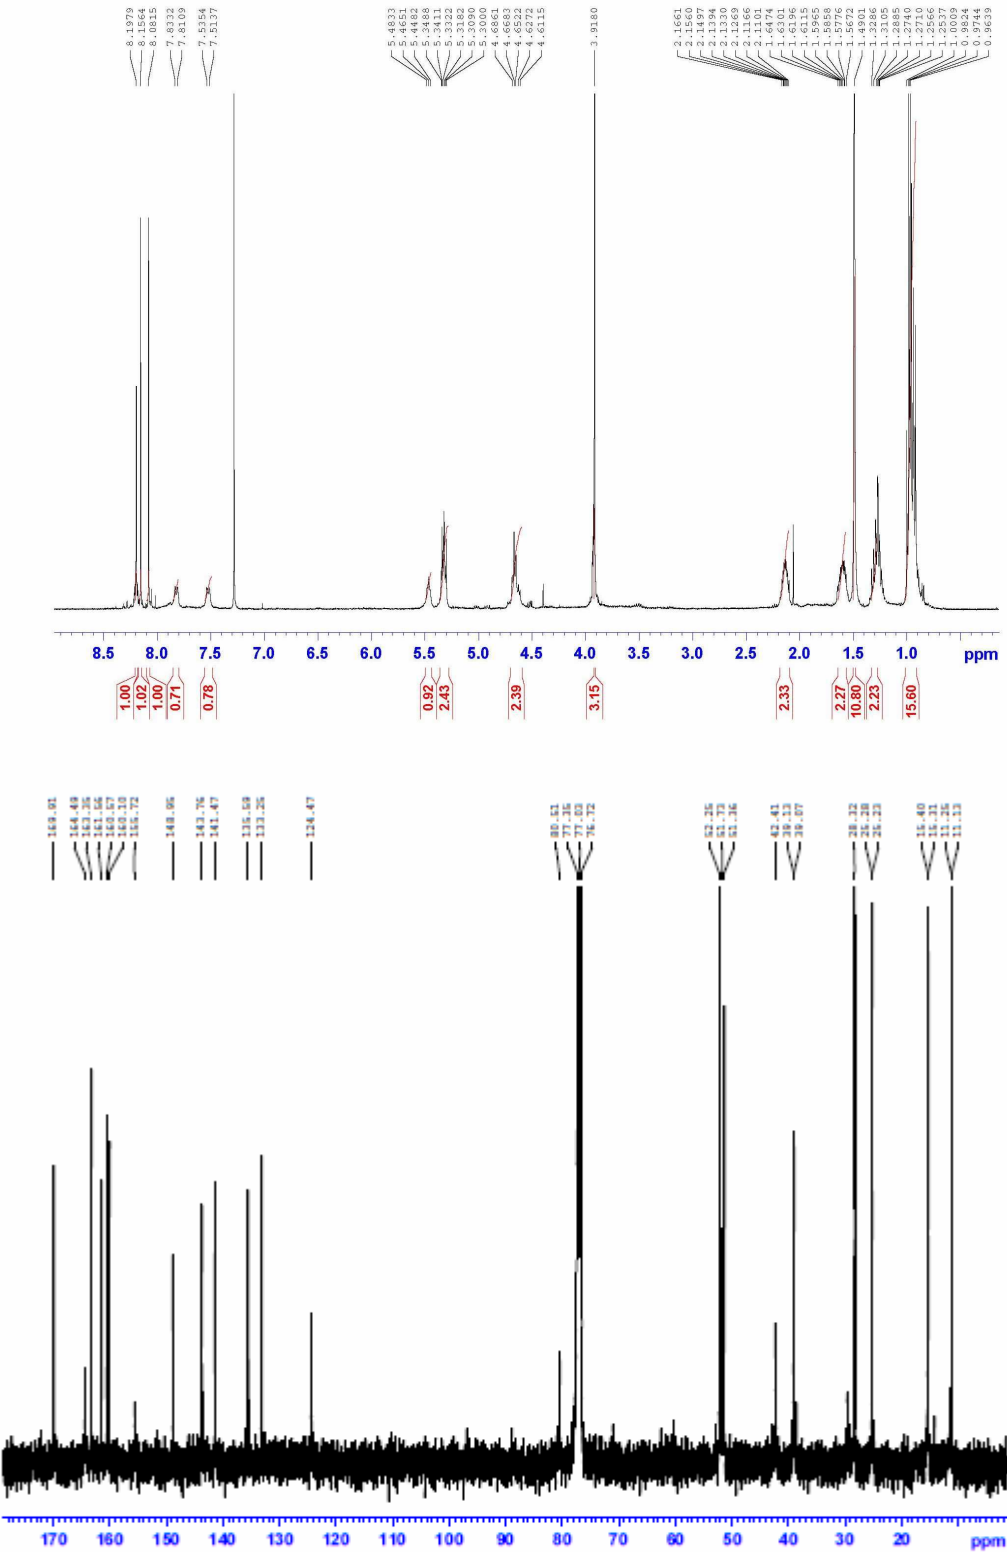

SHIMADZU

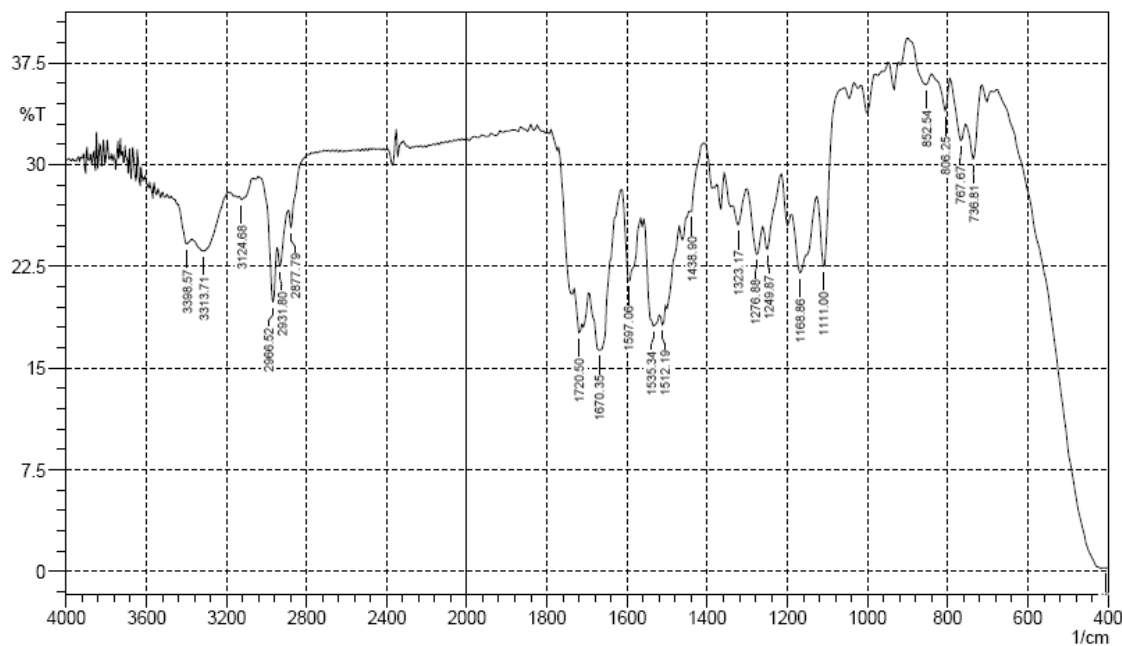

Generic Display Report (all)

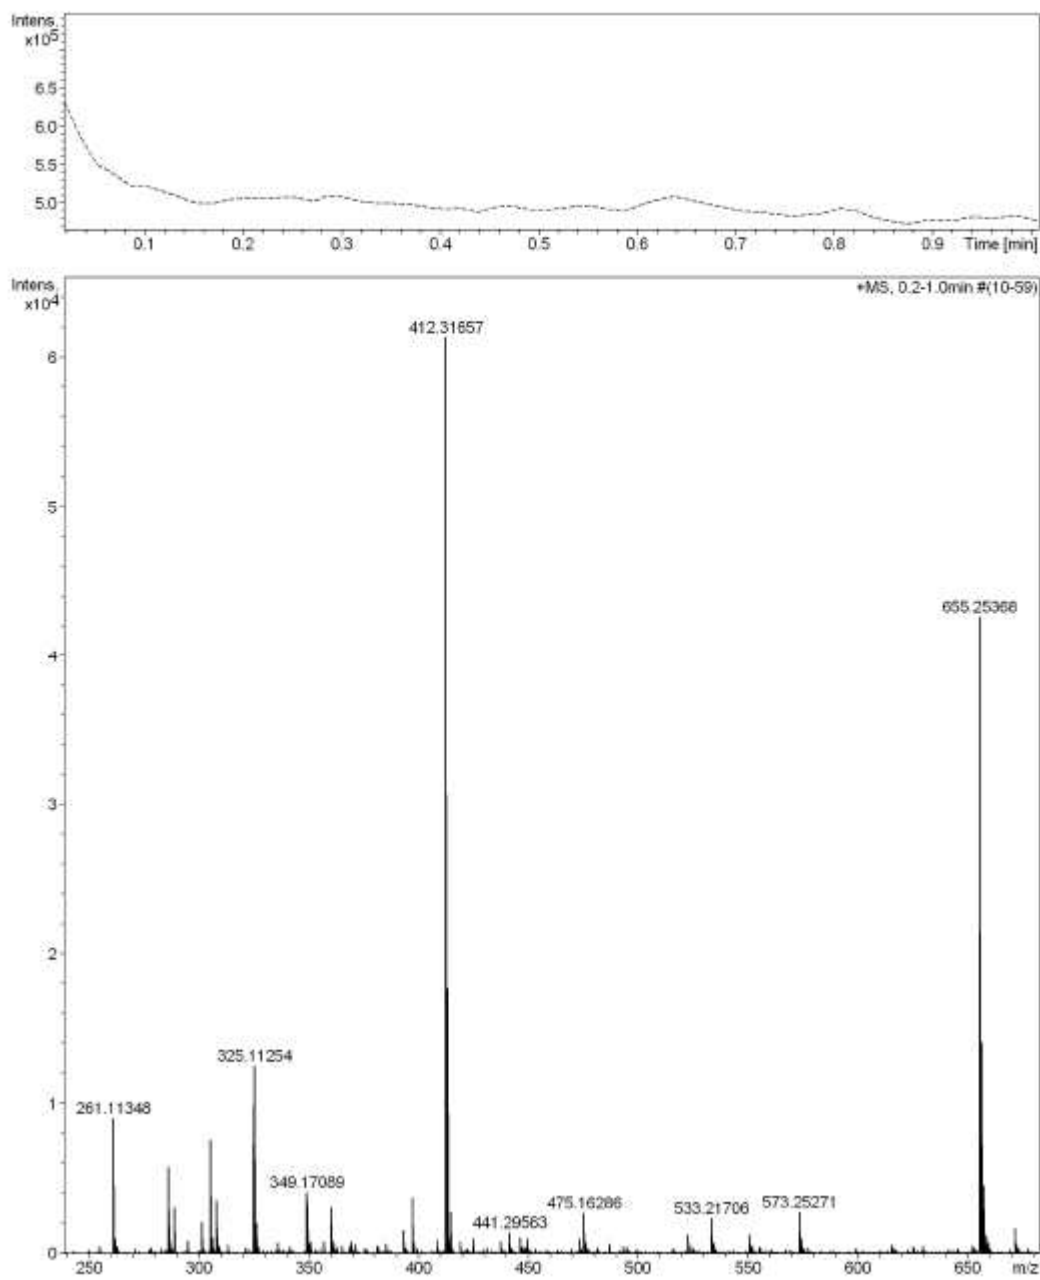



Tris-azole 13c

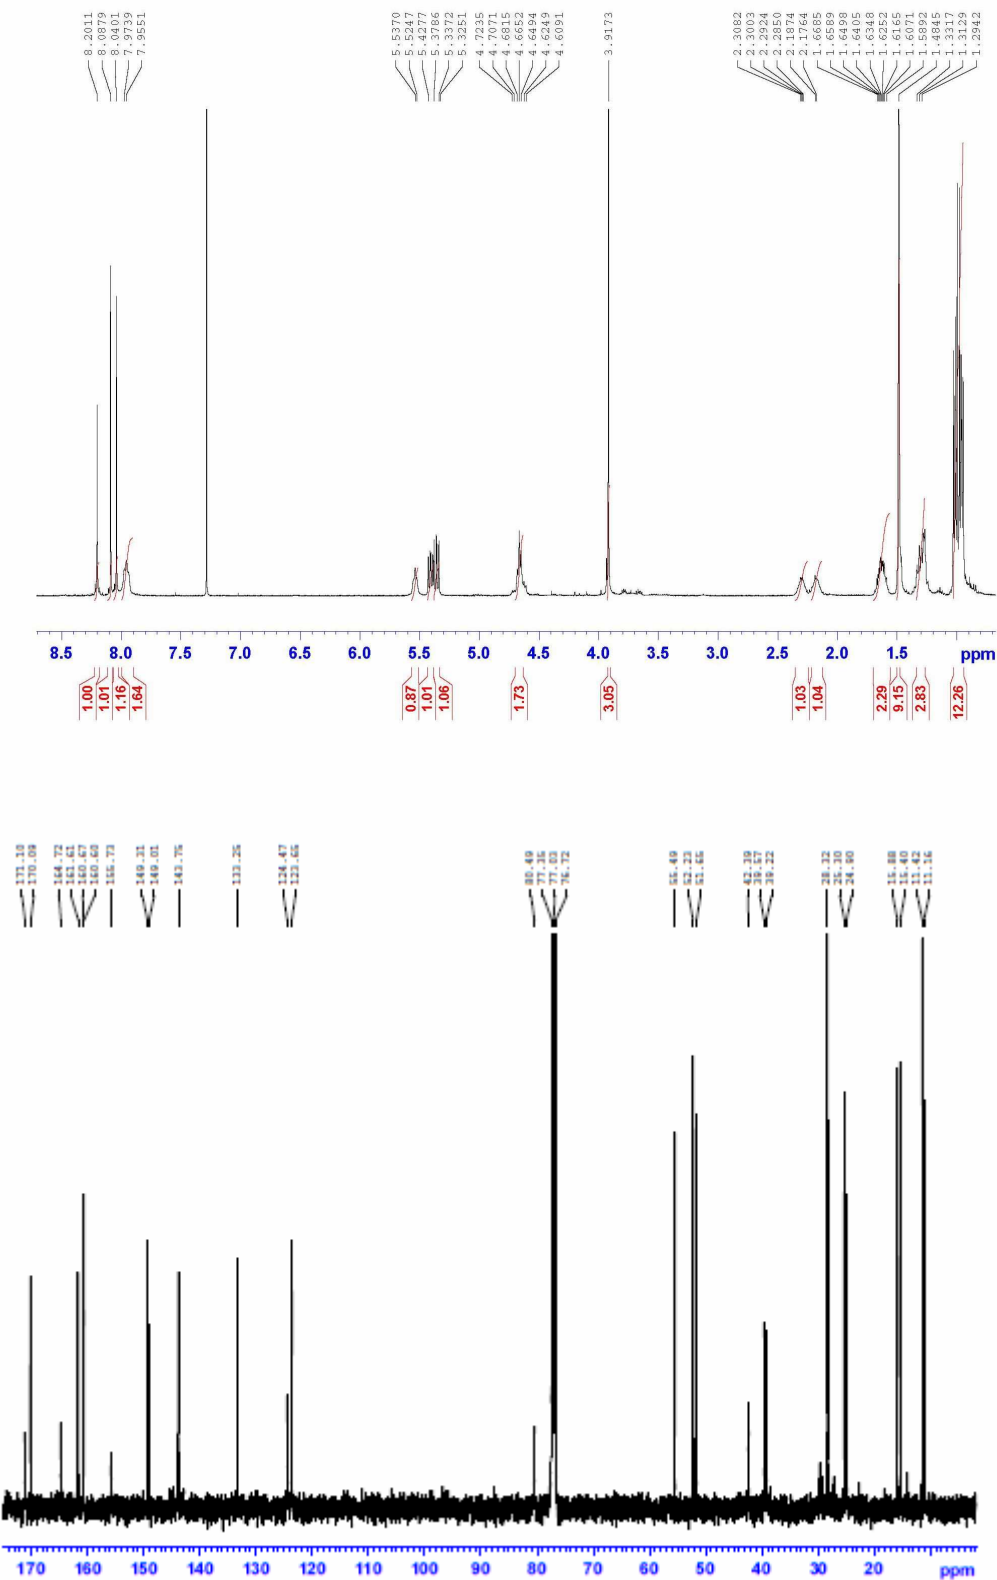

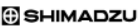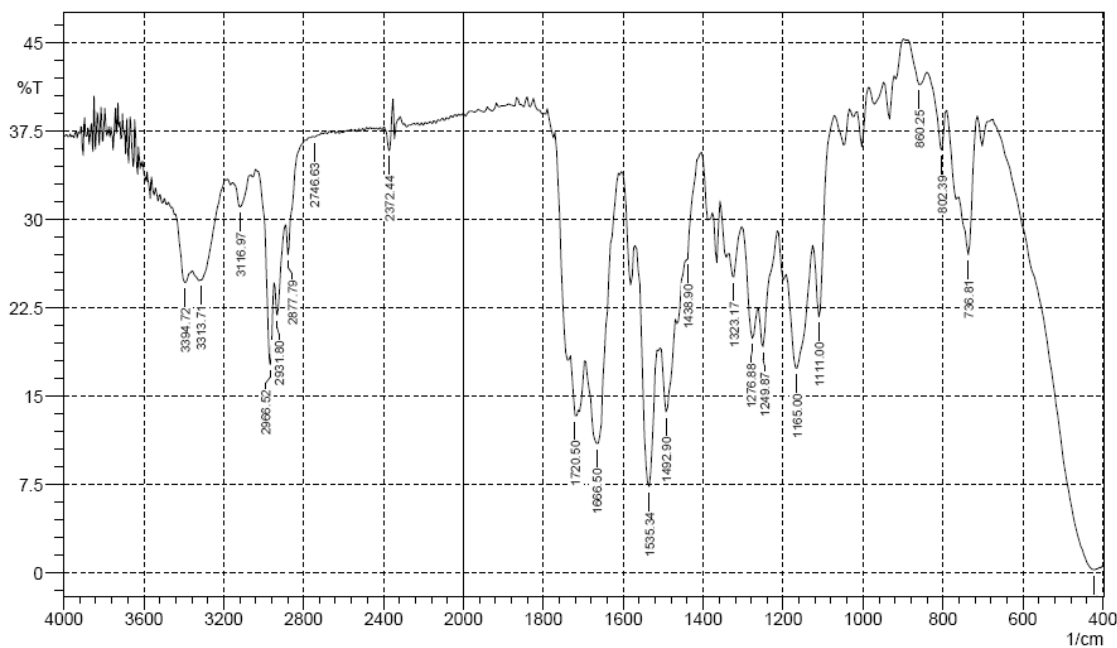

Generic Display Report (all)

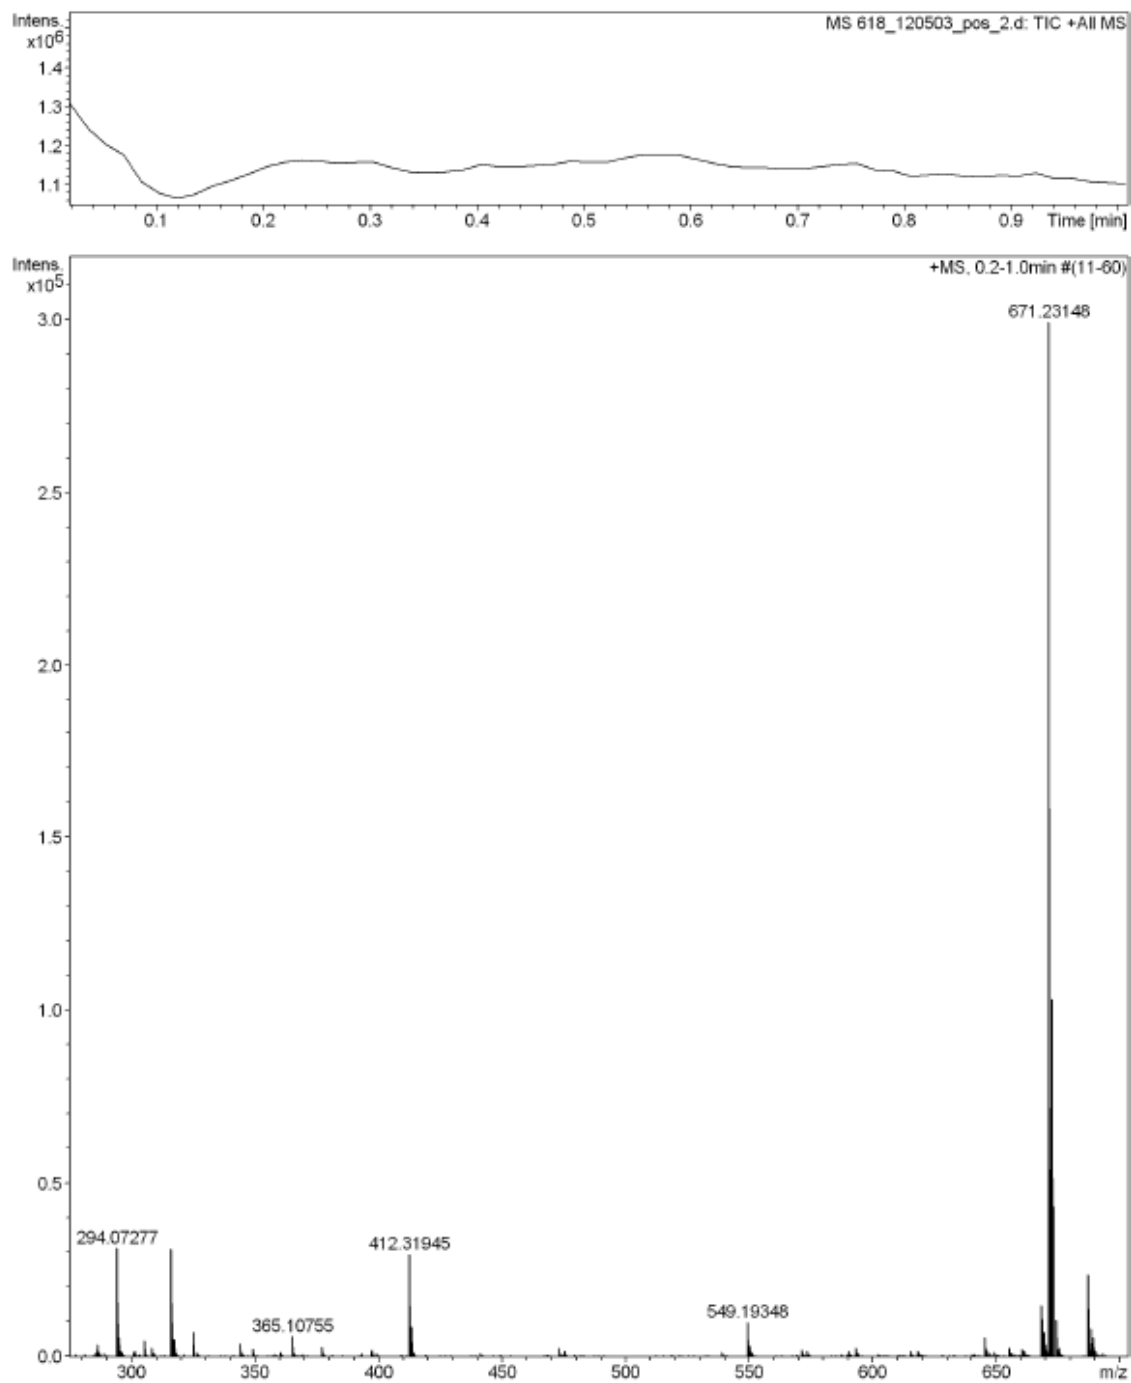

Cyclo-Gly-Oxz-Ile-Oxz-Ile-Thz (7a)

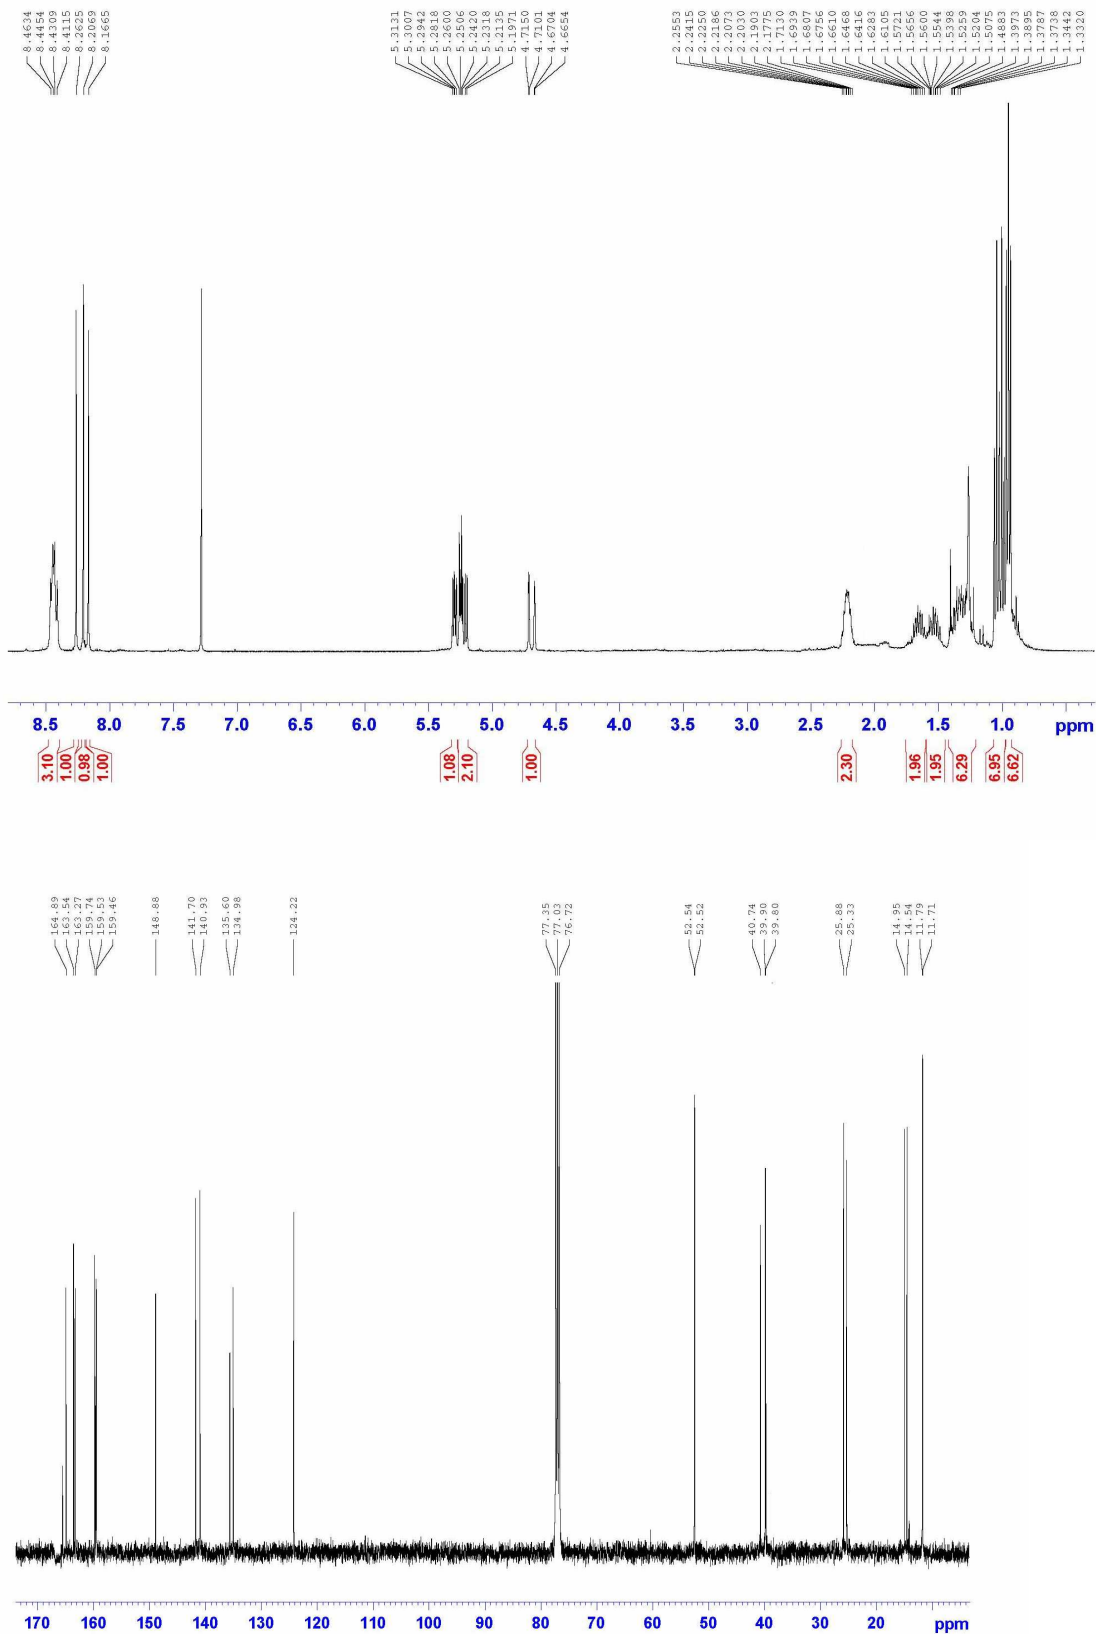

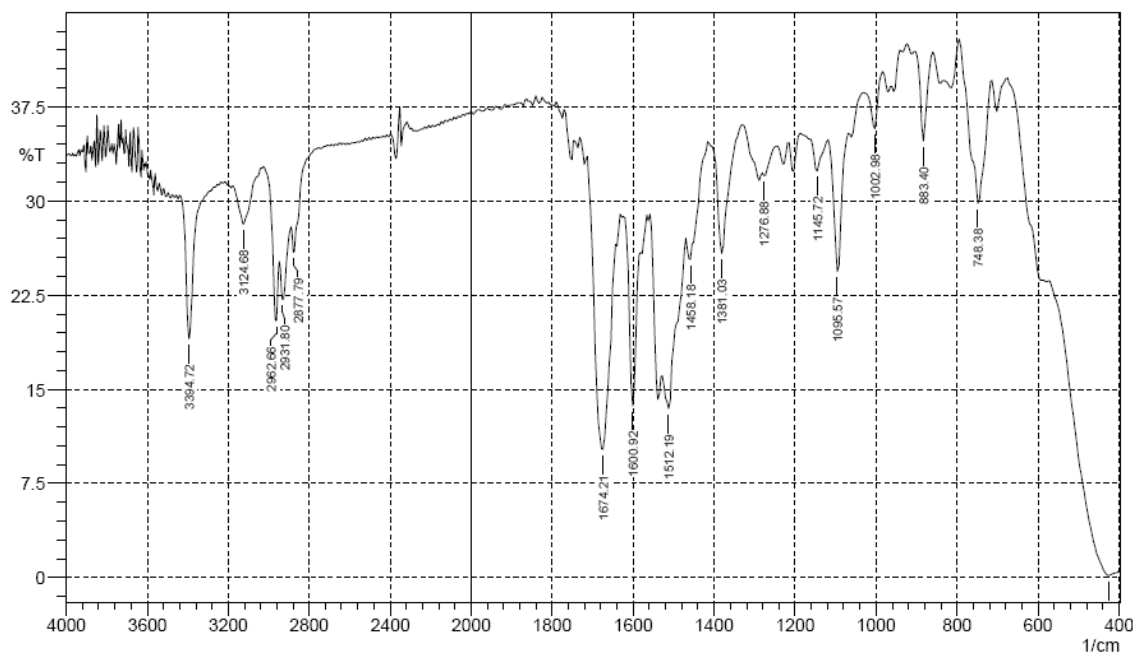

Generic Display Report (all)

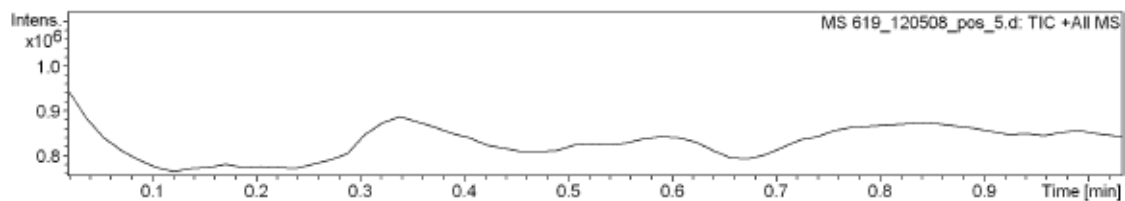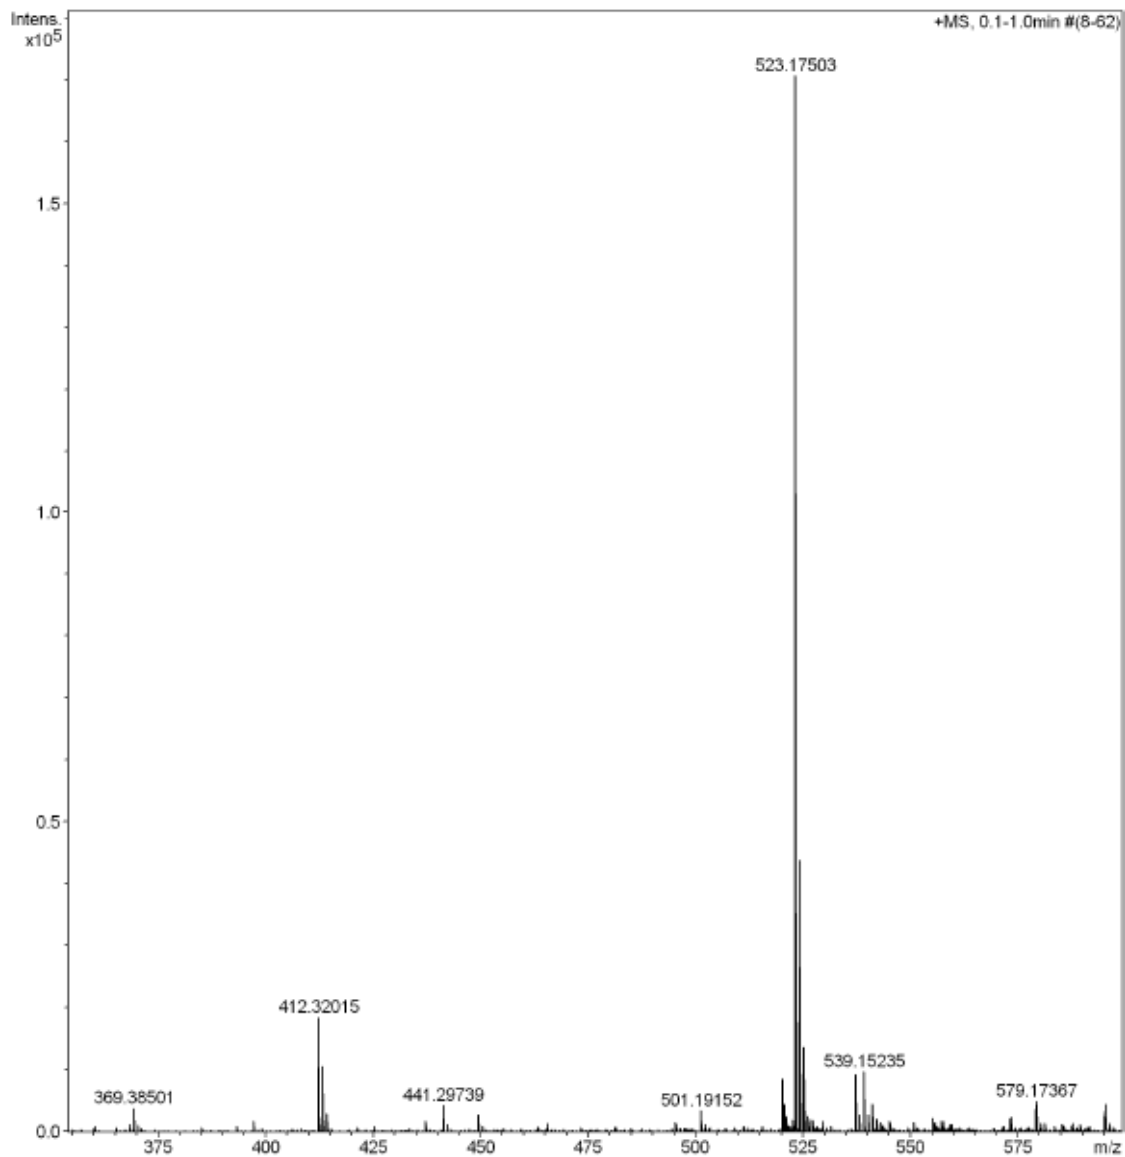

Cyclo-Ile-Oxz-Ile-Oxz-Ile-Oxz (7b)

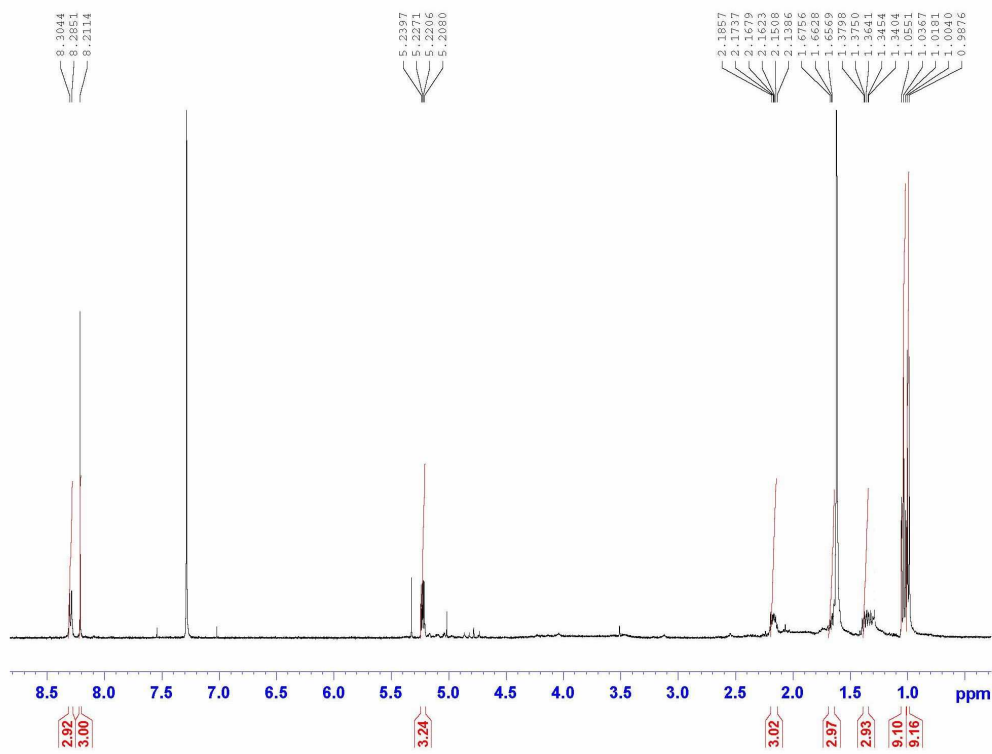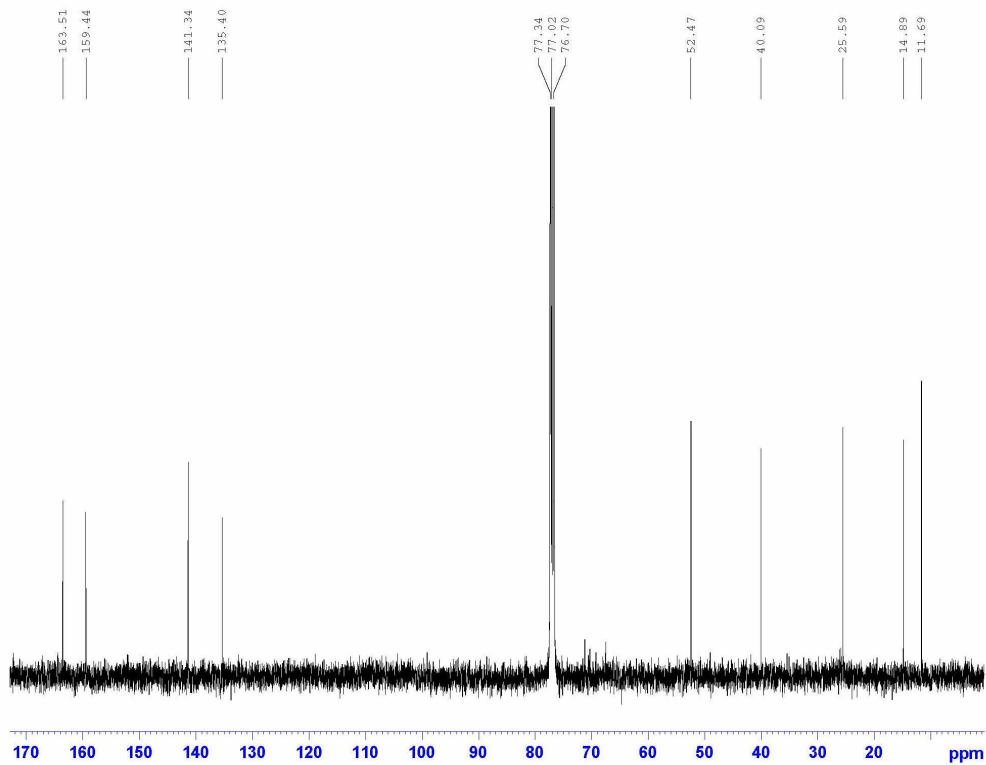

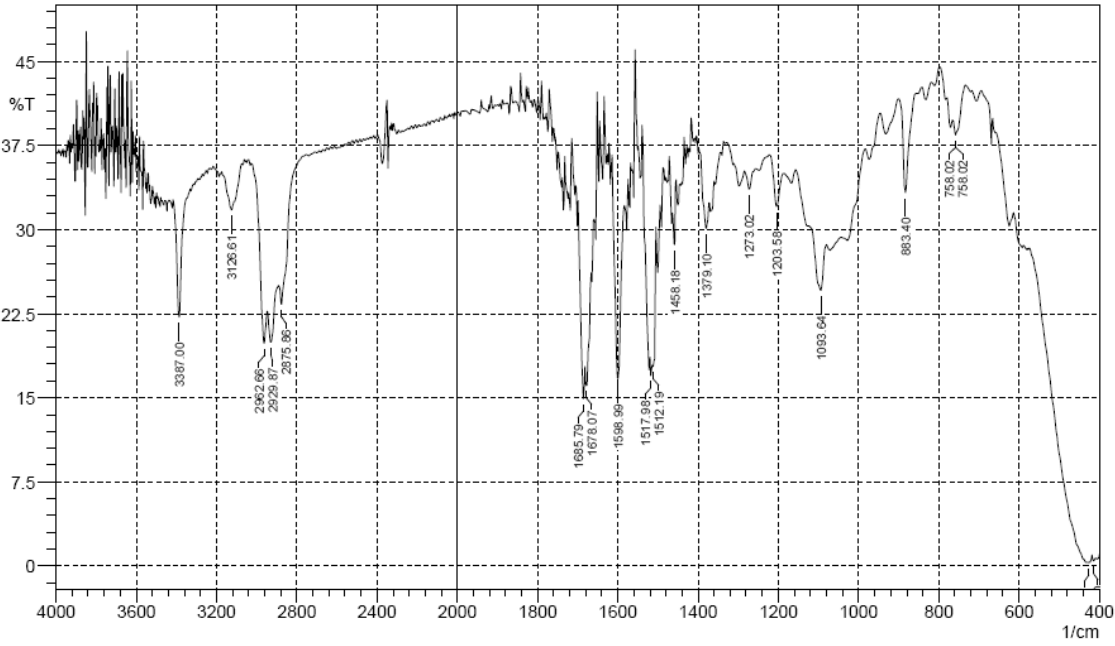



Generic Display Report (all)

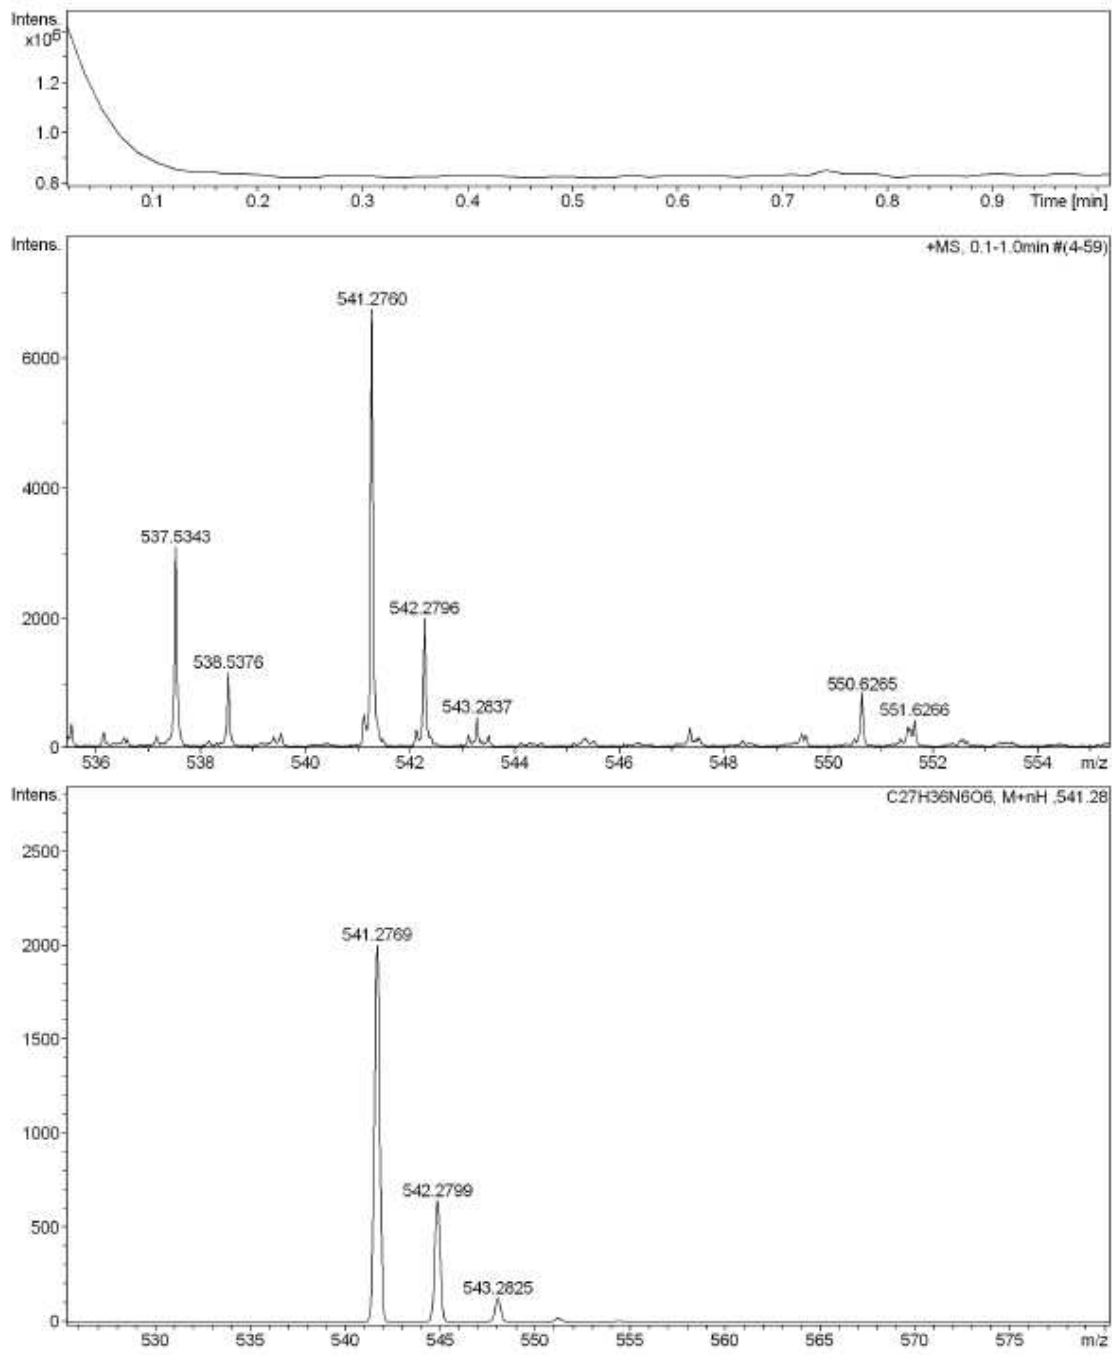

Cyclo-Gly-Oxz-Ile-Thz-Ile-Thz (7c)

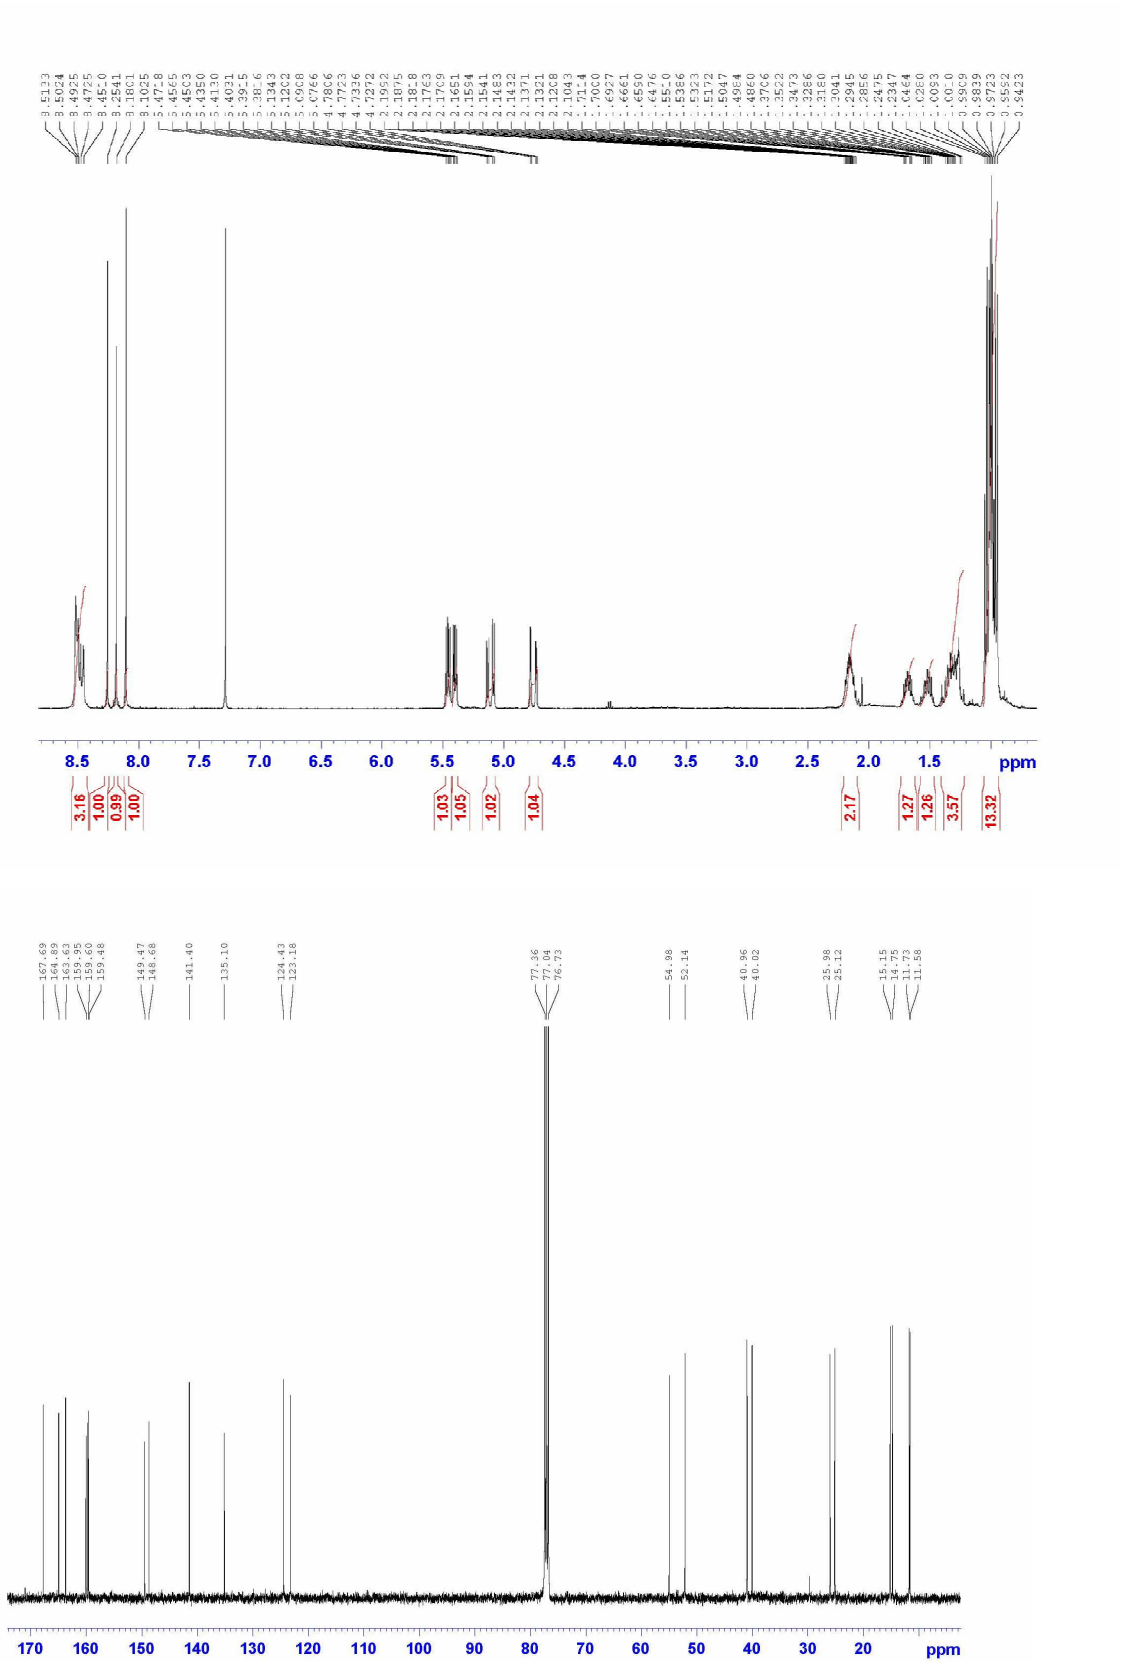

SHIMADZU

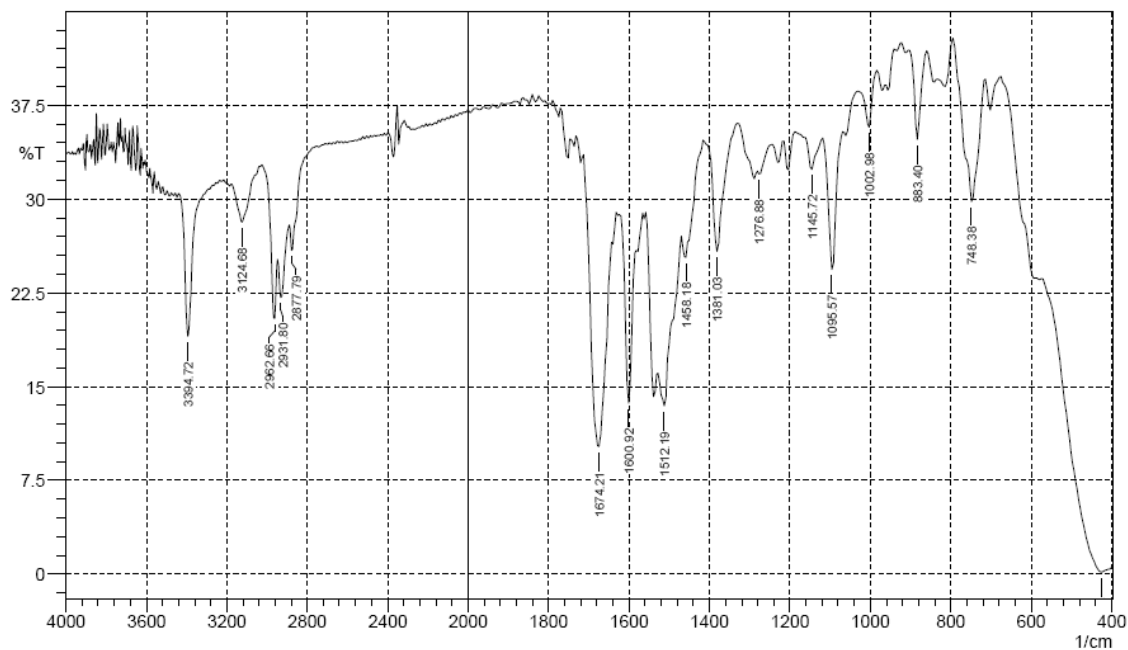

Generic Display Report (all)

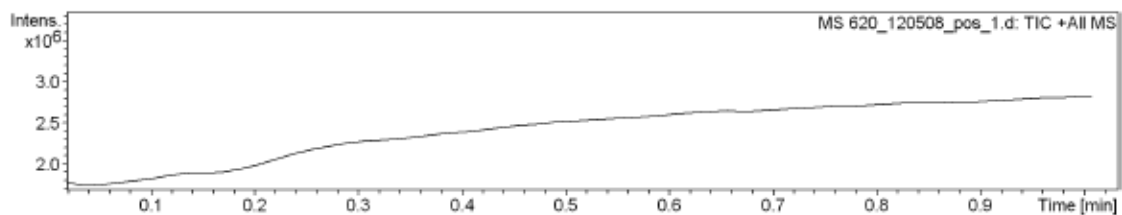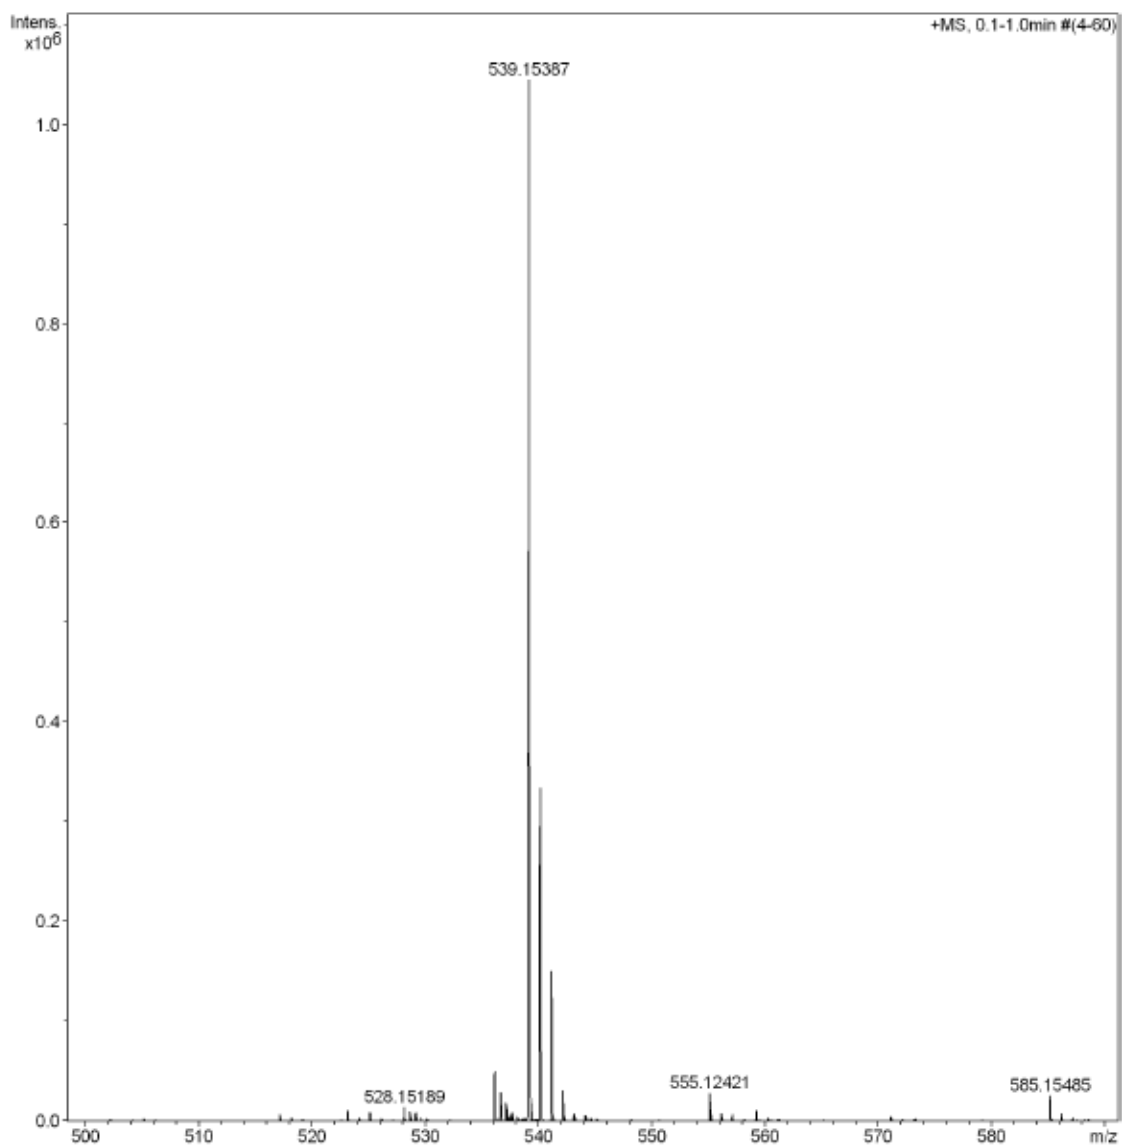

Supplement: c2md20218b.pdf [file c2md20218b.pdf]
